# Supplementary material for: Effects of Semen Processing on Sperm Function: Differences between Swim-Up and Density Gradient Centrifugation
Source: PubMed Central journal article supplement — World J Mens Health. 2020 Nov 19;39(4):740–9. doi: 10.5534/wjmh.200115 (PMC8443982; doi:10.5534/wjmh.200115), 2020-11-19
Supplement: wjmh-39-740-s001.pdf [file wjmh-39-740-s001.pdf]

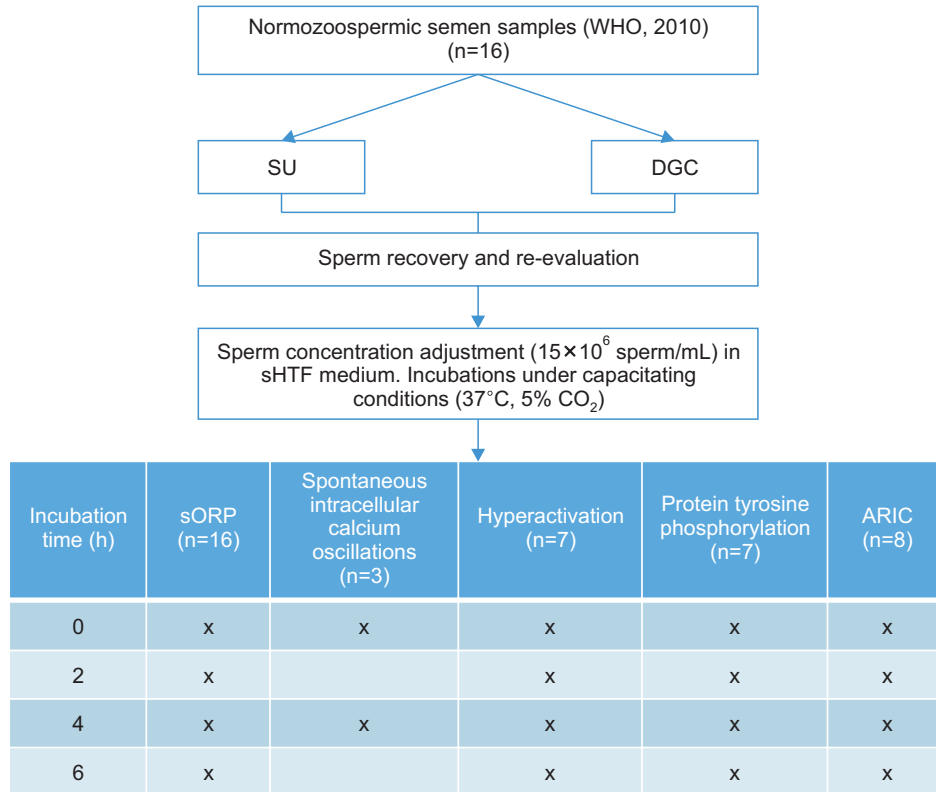

**Supplement Fig. 1.** Flow diagram of the experimental design. Semen samples were split in two fractions for simultaneous sperm isolation by swim-up (SU) and density gradient centrifugation (DGC). Recovered spermatozoa were incubated at different times for evaluation of the static oxidation-reduction potential (sORP), spontaneous intracellular calcium oscillations, hyperactivation, protein tyrosine phosphorylation, and acrosome reaction to ionophore challenge (ARIC). sHTF: supplemented human tubal fluid.
