# Supplementary material for: Effects of Semen Processing on Sperm Function: Differences between Swim-Up and Density Gradient Centrifugation
Source: PubMed Central journal article supplement — World J Mens Health. 2020 Nov 19;39(4):740–9. doi: 10.5534/wjmh.200115 (PMC8443982; doi:10.5534/wjmh.200115), 2020-11-19
Supplement: wjmh-39-740-s002.pdf [file wjmh-39-740-s002.pdf]

**Supplement Table 1.** Motility kinetic values of SU- and DGC-sperm (n=7)

| Variable   |     | 0 hour   | 2 hours   | 4 hours   | 6 hours    |
|------------|-----|----------|-----------|-----------|------------|
| VAP (µm/s) | SU  | 46.9±4.3 | 58.5±5.9  | 56.0±6.1  | 62.2±6.7   |
|            | DGC | 55.9±5.9 | 58.5±5.7  | 62.9±6.9  | 67.6±5.0   |
| VSL (µm/s) | SU  | 38.3±3.5 | 48.5±5.2  | 45.4±4.9  | 50.5±6.0   |
|            | DGC | 43.9±4.3 | 47.4±4.7  | 50.2±5.3  | 52.6±3.5   |
| VCL (µm/s) | SU  | 70.9±6.2 | 84.9±7.8  | 82.4±7.9  | 92.4±8.6   |
|            | DGC | 83.3±7.4 | 89.6±7.4  | 96.5±9.5* | 104.0±7.2* |
| ALH (µm)   | SU  | 3.6±0.3  | 4.2±0.4   | 4.0±0.4   | 4.5±0.4    |
|            | DGC | 4.1±0.5  | 4.4±0.4   | 4.8±0.5   | 5.1±0.5    |
| BCF (Hz)   | SU  | 16.7±1.9 | 16.8±3.0  | 16.6±1.8  | 15.6±2.6   |
|            | DGC | 13.6±2.6 | 14.9±2.7  | 14.3±2.6  | 15.8±3.6   |
| STR (%)    | SU  | 79.8±2.2 | 79.1±1.9  | 79.2±1.5  | 77.4±2.0   |
|            | DGC | 76.1±1.4 | 78.6±1.4  | 78.2±1.0  | 75.5±1.8   |
| LIN (%)    | SU  | 52.9±2.4 | 55.2± 2.2 | 54.6±2.3  | 53.1±2.1   |
|            | DGC | 51.9±1.5 | 52.9±1.5  | 52.7±1.2  | 50.5±1.5   |

Values are presented as mean±standard error of mean.

SU: swim-up, DGC: density gradient centrifugation, VAP: average path velocity, VSL: straight line velocity, VCL: curvilinear velocity, ALH: amplitude of lateral head displacement, STR: straightness (VSL/VAP), LIN: linearity (VSL/VCL).

\*p<0.05 vs. SU.
